# Supplementary material
Source: publisher site journal article supplement (https://www.dovepress.com/article/549502)
Supplement: Supplementary file 1 [file 549502.docx]

**Supplementary material**

**Table S1: Demographic, Clinical and Biochemical variables stratified by the occurrence of any cancer or eczema/urticaria**

|  | Cancer | | | Eczema/Urticaria | | |
| --- | --- | --- | --- | --- | --- | --- |
|  | Yes (n=3) | No (n=63) | p | Yes (n=3) | No (n=63) | p |
| Gender (M), n (%) | 2 (66.7) | 41 (65.1) | 1 | 2 (66.7) | 41 (65.1) | 1 |
| Age, years ± SD | 69.3 ± 5.9 | 70.8 ± 6.4 | 0.588 | 66.3 ± 1.5 | 70.9 ± 6.4 | 0.154 |
| Baseline PASI | 18.6 ± 6.5 | 13.1 ± 7.1 | 0.127 | 8.7 ± 2.1 | 13.6 ± 7.2 | 0.161 |
| PsA | 2 (66.7) | 15 (23.8) | 0.326 | 1 (33.3) | 16 (25.4) | 1 |
| Pso family history | 0 (0.0) | 23 (36.5) | 0.499 | 3 (100) | 20 (31.7) | 0.071 |
| Bio-naïve | 1 (33.3) | 22 (34.9) | 1 | 1 (33.3) | 22 (34.9) | 1 |
| Biologic failures | 1.00 ± 1.00 | 0.95 ± 1.05 | 0.793 | 1.00 ± 1.00 | 0.95 ± 1.05 | 0.793 |
| Disease duration | 27.3 ± 3.2 | 24.8 ± 15.1 | 0.782 | 22.3 ± 21.5 | 25.05 ± 14.64 | 0.735 |
| BMI (kg/m2), mean ± SD | 28.6 ± 6.3 | 27.7 ± 5.0 | 0.939 | 27.8 ± 5.1 | 28.0 ± 5.2 | 0.812 |
| Number of comorbidities, mean ± SD | 3.0 ± 2.0 | 3.4 ± 2.6 | 0.963 | 2.3 ± 1.2 | 3.4 ± 2.6 | 0.564 |
| Hypertension, n (%) | 3 (100) | 46 (73.0) | 0.712 | 2 (66.7) | 47 (74.6) | 1 |
| Obesity, n (%) | 1 (33.3) | 16 (25.4) | 1 | 0 (0.0) | 17 (27.0) | 0.712 |
| Diabetes, n (%) | 1 (33.3) | 16 (25.4) | 1 | 1 (33.3) | 16 (25.4) | 1 |
| Chronic Kidney Disease, n (%) | 0 (0.0) | 17 (27.0) | 0.712 | 1 (33.3) | 16 (25.4) | 1 |
| Hyperuricemia, n (%) | 0 (0.0) | 11 (17.5) | 1 | 1 (33.3) | 10 (15.9) | 1 |
| Any heart disorder, n (%)* | 1 (33.3) | 18 (28.6) | 1 | 0 (0.0) | 19 (30.2) | 0.635 |
| Hypercholesterolemia, n (%) | 0 (0.0) | 15 (23.8) | 0.798 | 0 (0.0) | 15 (23.8) | 0.798 |
| Any thyroid disorder, n (%)** | 0 (0.0) | 9 (14.3) | 1 | 0 (0.0) | 9 (14.3) | 1 |
| Any psychiatric disorder, n (%)*** | 0 (0.0) | 6 (9.5) | 1 | 0 (0.0) | 6 (9.5) | 1 |
| Any liver disease, n (%) | 1 (33.3) | 7 (11.1) | 0.805 | 0 (0.0) | 8 (12.7) | 1 |
| Any respiratory disorder, n (%) | 0 (0.0) | 4 (6.3) | 1 | 0 (0.0) | 4 (6.3) | 1 |
| Any hematological disorder, n (%) | 0 (0.0) | 5 (7.9) | 1 | 0 (0.0) | 5 (7.9) | 1 |
| Atopic diathesis, n (%) | 0 (0.0) | 4 (6.3) | 1 | 3 (100.0) | 1 (1.6) | **<0.001** |
| Any gastric disorder, n (%) | 0 (0.0) | 4 (6.3) | 1 | 0 (0.0) | 4 (6.3) | 1 |
| Benign Prostate Hyperplasia, n (%) | 0 (0.0) | 4 (6.3) | 1 | 0 (0.0) | 4 (6.3) | 1 |
| Number of therapies, mean ± SD | 3.0 ± 1.7 | 3.1 ± 2.6 | 0.864 | 1.3 ± 1.2 | 3.2 ± 2.6 | 0.195 |
| Low-dose aspirin, n (%) | 1 (33.3) | 18 (28.6) | 1 | 0 (0.0) | 19 (30.2) | 0.635 |
| Statins, n (%) | 0 (0.0) | 18 (28.6) | 0.673 | 0 (0.0) | 18 (28.6) | 0.673 |
| Levothyroxine, n (%) | 0 (0.0) | 8 (12.7) | 1 | 0 (0.0) | 8 (12.7) | 1 |
| Calcium-channel blockers, n (%) | 0 (0.0) | 13 (20.6) | 0.893 | 0 (0.0) | 13 (20.6) | 0.893 |
| Insulin therapy, n (%) | 0 (0.0) | 3 (4.8) | 1 | 1 (33.3) | 2 (3.2) | 0.302 |
| Beta blockers, n (%) | 0 (0.0) | 23 (36.5) | 0.499 | 2 (66.7) | 21 (33.3) | 0.573 |
| ACE inhibitors, n (%) | 0 (0.0) | 14 (22.2) | 0.844 | 0 (0.0) | 14 (22.2) | 0.844 |
| ARBs, n (%) | 3 (100.0) | 11 (17.5) | **0.007** | 0 (0.0) | 14 (22.2) | 0.844 |
| Metformin, n (%) | 1 (33.3) | 7 (11.1) | 0.805 | 0 (0.0) | 8 (12.7) | 1 |
| Diuretics, n (%) | 2 (66.7) | 12 (19.0) | 0.212 | 0 (0.0) | 14 (22.2) | 0.844 |
| Allopurinol, n (%) | 0 (0.0) | 8 (12.7) | 1 | 1 (33.3) | 7 (11.1) | 0.805 |
| PPIs, n (%) | 0 (0.0) | 11 (17.5) | 1 | 0 (0.0) | 11 (17.5) | 1 |
| Alpha blockers, n (%) | 0 (0.0) | 6 (9.5) | 1 | 0 (0.0) | 6 (9.5) | 1 |
| Red Blood Cells x 106/mcL, mean ± SD | 4.28 ± 0.59 | 4.55 ± 0.56 | 0.409 | 5.32 ± 1.03 | 4.50 ± 0.51 | 0.116 |
| Hemoglobin (g/dL), mean ± SD | 13.90 ± 2.49 | 14.39 ± 1.63 | 0.812 | 16.37 ± 1.97 | 14.27 ± 1.59 | 0.065 |
| Platelets x103/mcL, mean ± SD | 241.67 ± 86.52 | 235.7 ± 57.37 | 0.874 | 294.00 ± 34.39 | 233.13 ± 57.67 | 0.075 |
| Neutrophils x103/mcL, mean ± SD | 4.04 ± 1.41 | 4.33 ± 1.57 | 0.874 | 5.58 ± 2.31 | 4.26 ± 1.51 | 0.234 |
| Lymphocytes x103/mcL, mean ± SD | 1.66 ± 0.41 | 1.88 ± 0.71 | 0.668 | 2.97 ± 0.39 | 1.81 ± 0.66 | **0.014** |
| Monocytes x103/mcL, mean ± SD | 0.53 ± 0.16 | 0.59 ± 0.21 | 0.691 | 0.60 ± 0.17 | 0.59 ± 0.21 | 0.886 |
| Eosinophils x103/mcL, mean ± SD | 0.12 ± 0.05 | 0.35 ± 0.57 | 0.365 | 2.15 ± 0.72 | 0.25 ± 0.37 | **0.004** |
| Basophils x103/mcL, mean ± SD | 0.06 ± 0.02 | 0.05 ± 0.04 | 0.303 | 0.04 ± 0.02 | 0.05 ± 0.04 | 0.962 |
| Creatinine (mg/dL) ± SD | 0.99 ± 0.12 | 1.01 ± 0.40 | 0.495 | 0.93 ± 0.23 | 1.01 ± 0.40 | 0.899 |
| ELR, mean ± SD | 0.07 ± 0.01 | 0.18 ± 0.28 | 0.356 | 0.71 ± 0.17 | 0.15 ± 0.25 | **0.007** |
| NLR, mean ± SD | 2.53 ± 1.09 | 2.61 ± 1.40 | 0.987 | 1.84 ± 0.62 | 2.65 ± 1.39 | 0.246 |
| PLR, mean ± SD | 156.62 ± 88.06 | 143.16 ± 64.81 | 0.861 | 101.15 ± 24.99 | 145.89 ± 65.97 | 0.198 |
| GGT (U/L), mean ± SD | 24.67 ± 15.04 | 33.00 ± 33.96 | 0.583 | 26.67 ± 22.72 | 32.90 ± 33.84 | 0.722 |
| AST (U/L), mean ± SD | 19.67 ± 4.73 | 22.80 ± 9.27 | 0.556 | 21.33 ± 8.62 | 22.72 ± 9.19 | 0.987 |
| ALT (U/L), mean ± SD | 16.33 ± 11.02 | 21.20 ± 11.32 | 0.332 | 22.00 ± 19.97 | 20.92 ± 10.95 | 0.578 |
| Glucose (mg/dL), mean ± SD | 113.33 ± 21.13 | 104.52 ± 35.05 | 0.260 | 93.00 ± 14.14 | 105.42 ± 34.88 | 0.811 |

P values in bold indicate statistical significance (p < 0.05)

* = including ischemic heart disease, atrial fibrillation, atrial flutter, heart failure; **= including Hashimoto hypothyroidism and multinodular goiter ; *** = including bipolar disorder, ADHD, anxious-depressive syndrome

PsA Psoriatic Arthritis, BMI Body Mass Index, GERD Gastro Esophageal Reflux Disease, SD Standard Deviation, ACE Angiotensin Converting Enzyme, ARB Angiotensin-Receptor Blocker, PPIs Proton Pump Inhibitors, ELR Eosinophil-to-Lymphocyte Ratio, NLR Neutrophil-to-Lymphocyte Ratio, PLR Platelet-to-Lymphocyte Ratio, GGT Gamma-glutamil Transpherase, AST Aspartate Transaminase, ALT Alanine Transaminase
